# Supplementary material for: CD63, MHC class 1, and CD47 identify subsets of extracellular vesicles containing distinct populations of noncoding RNAs
Source: PubMed Central journal article supplement (PMC5803193; doi:10.1038/s41598-018-20936-7), 2018-02-07
Supplement: 41598_2018_20936_MOESM1_ESM.pdf [file 41598_2018_20936_MOESM1_ESM.pdf]

## **Supplemental Data for**

### **CD63, MHC class 1, and CD47 identify subsets of extracellular vesicles containing distinct populations of noncoding RNAs**

Sukhbir Kaur<sup>1</sup>, Abdel G. Elkahloun<sup>2</sup>, Anush Arakelyan<sup>3</sup>, Lynn Young<sup>4</sup>, Timothy G. Myers<sup>5</sup>, Francisco Otaizo-Carrasquero<sup>5</sup>, Weiwei Wu<sup>2</sup>, Leonid Margolis<sup>3</sup>, and David D. Roberts<sup>1\*</sup>

<sup>1</sup>Laboratory of Pathology, Center for Cancer Research, National Cancer Institute, National Institutes of Health, Bethesda MD 20982, USA

<sup>2</sup>Cancer Genetics Branch, National Human Genome Research Institute, National Institutes of Health, Bethesda, MD 20892, USA.

<sup>3</sup>Section of Intercellular Interactions, Eunice Kennedy-Shriver National Institute of Child Health and Human Development, National Institutes of Health, Bethesda MD 20982

<sup>4</sup>National Institutes of Health Library, Division of Library Services, Office of Research Services, National Institutes of Health, Bethesda, MD 20892, USA

<sup>5</sup>Genomic Technologies Section, Research Technologies Branch, National Institute of Allergy and Infectious Diseases, National Institutes of Health, Bethesda, MD 20892, USA

## Supplementary Figure Legends

**Figure S1: (a, b)** Capturing efficiency of CD63 conjugated MNPs. **(c-d)** Extracted EVs were prepared using the Exo-Quick kit, and vesicle size and concentration were measured using Nanosight.

**Figure S2: (a)** Side scattering for calibrating beads of the indicated sizes. **(b)** Bodipy-FL labeled EVs released from Jurkat cells were captured with anti-CD63-MNPs and analyzed by flow cytometry. Volumetric control was used to estimate the concentration of captured EVs

**Figure S3: (a)** Bodipy labeled EVs released from Jurkat or JinB8 cells were captured with anti-MHC1-MNPs and analyzed using flow cytometry. Volumetric control was used to estimate the concentration of captured EVs

**Figure S4:** RNA profiles were obtained using a RNA Bioanalyzer for the indicated capture vs uncaptured CD47, CD63 and MHC1-EVs for RNA sequencing samples.

**Figure S5:** Experimental design and work flow for the RNA-sequencing data analysis of selected small RNAs.

**Figure S6: (a-c)** RNA profiles were obtained using RPKM normalization comparing captured and uncaptured CD47, CD63 and MHC1 EVs with absolute value of the fold change greater than 2.0 using scale log base 2. The number of upregulated RNAs in captured CD47, CD63 and MHC1 EVs are shown as pie charts.

**Figure S7: (a)** Scatter graph of biological replicates comparing CD47<sup>+</sup> and CD63<sup>+</sup> EVs showing 24 transcripts ( $p < 0.05$  and absolute value of the fold change greater than 2.0) using scale log base 2 of total RPM, (CD47\_CAP and CD63\_CAP, Student's- t-test). 627 transcripts pass the fold change cutoff before the application of the statistical test. **(b)** A Scatter graph of biological replicates ( $n=2$ ) between CD47<sup>+</sup>/MHC1<sup>+</sup> EVs showing 682 transcripts at 2-fold change before application of the statistical test and 41 (White) at  $p < 0.05$  using log base 2 of total RPM, X-axis (CD47\_CAP and MHC1\_CAP). **(c)** A Scatter graph of biological replicates comparing CD63<sup>+</sup> and MHC1<sup>+</sup> EVs showing 483 transcripts at 2-fold change before application of the statistical test and 9 highlighted (White) at  $p < 0.05$  using scale log base 2 of total RPM, (CD63\_CAP and MHC\_CAP). **(d)** Heat map of hierarchical clustering of the 24 transcripts at  $p < 0.05$  comparing CD47<sup>+</sup> and CD63<sup>+</sup> EVs. **(e)** Heat map of hierarchical clustering of the 38 transcripts at  $p < 0.05$  comparing CD63<sup>+</sup>

and CD63<sup>-</sup> EVs. **(f)** Heat map of hierarchical clustering of the 9 transcripts at  $p < 0.05$  comparing CD63<sup>+</sup> and MHC1<sup>+</sup> EVs.

**FigureS8:** **(a)** A Scatter graph of biological replicates ( $n=3$ ) between CD47<sup>+</sup>/CD47<sup>-</sup> EVs showing 109 miRNA (All species) highlighted (White) at  $p < 0.05$  using scale log base 2 of total RPM, (CD47\_CAP and CD47\_UnCap). **(b)** A Scatter graph of biological replicates ( $n=2$ ) comparing CD63<sup>+</sup> and CD63<sup>-</sup> EVs showing 208 miRNAs (All species) highlighted (White) at  $p < 0.05$  using scale log base 2 of total RPM, (CD63\_CAP and CD63\_UnCap). **(c)** A Scatter graph of biological replicates ( $n=2$ ) between MHC1<sup>+</sup>/MHC1<sup>-</sup> EVs showing 135 miRNAs highlighted (White) at  $p < 0.05$  using scale log base 2 of total RPM, X-axis (MHC1\_CAP and MHC\_UnCap).

**Figure S9:** **(a)** Hierarchical clustering of 135 miRNAs (All species) that were significant at  $p < 0.05$  (Student-t test) comparing MHC1<sup>+</sup> AND MHC<sup>-</sup> EVs. **(b)** Out of 135 miRNAs, 7 hsa-miRNA were enriched in MHC1<sup>+</sup> EVs. A comparison of MHC1<sup>+</sup> and CD47<sup>+</sup> EVs showed differential expression of 5 hsa-miRNAs. **(c)** Microarray ratio files were imported into miRNA analysis Array Star project, and fold change was calculated by comparing CD47<sup>+</sup> and CD63<sup>+</sup> EVs and CD47<sup>+b</sup> and CD63<sup>+b</sup> EVs. Using the 1.5 fold change cutoff and  $P\text{-value} \leq 0.05$ , 60 miRNA were found common between the RNA sequencing and microarray analyses. The pie chart shows UP (upregulated in CD47<sup>+</sup> and CD63<sup>+</sup> EVs), Down (in both), and UP/DOWN (not consistent). **(d)** Venn diagram of Captured CD63<sup>+</sup>, CD47<sup>+</sup> and MHC1<sup>+</sup> EV miRNAs identified by sequencing analysis aligned with the non-coding genome using DNA Array Star 14.

Figure S1

### CD63 capture efficiency

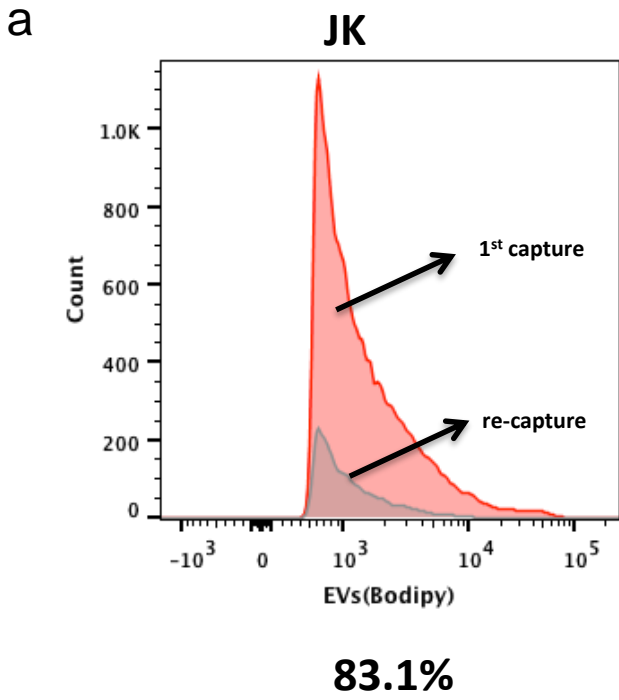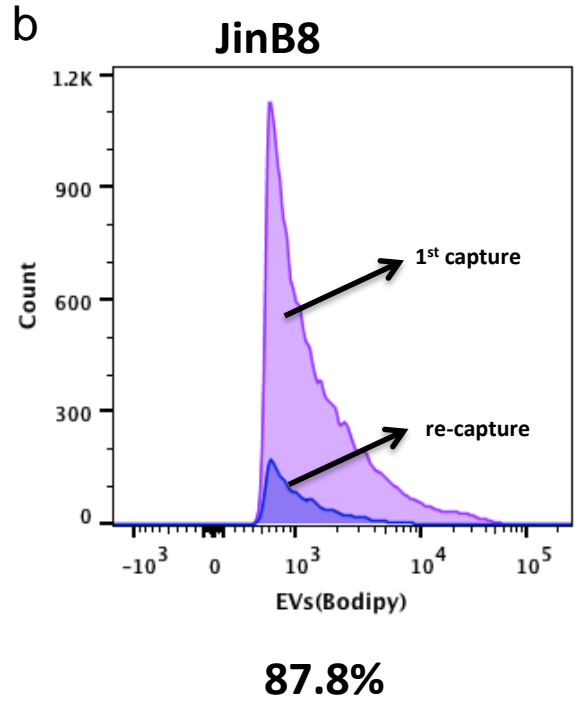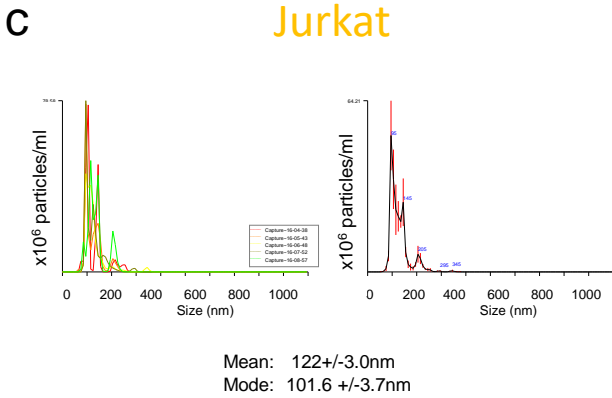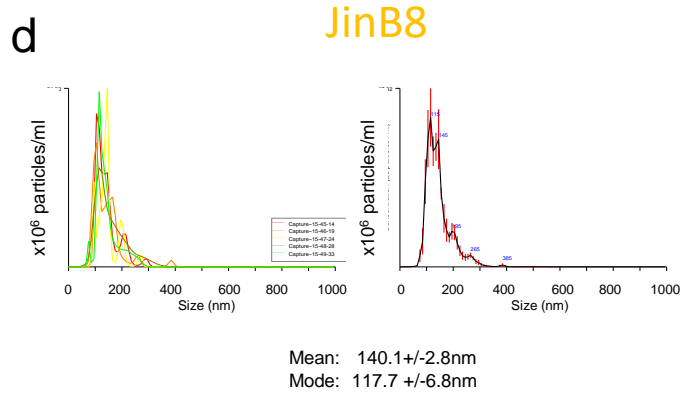

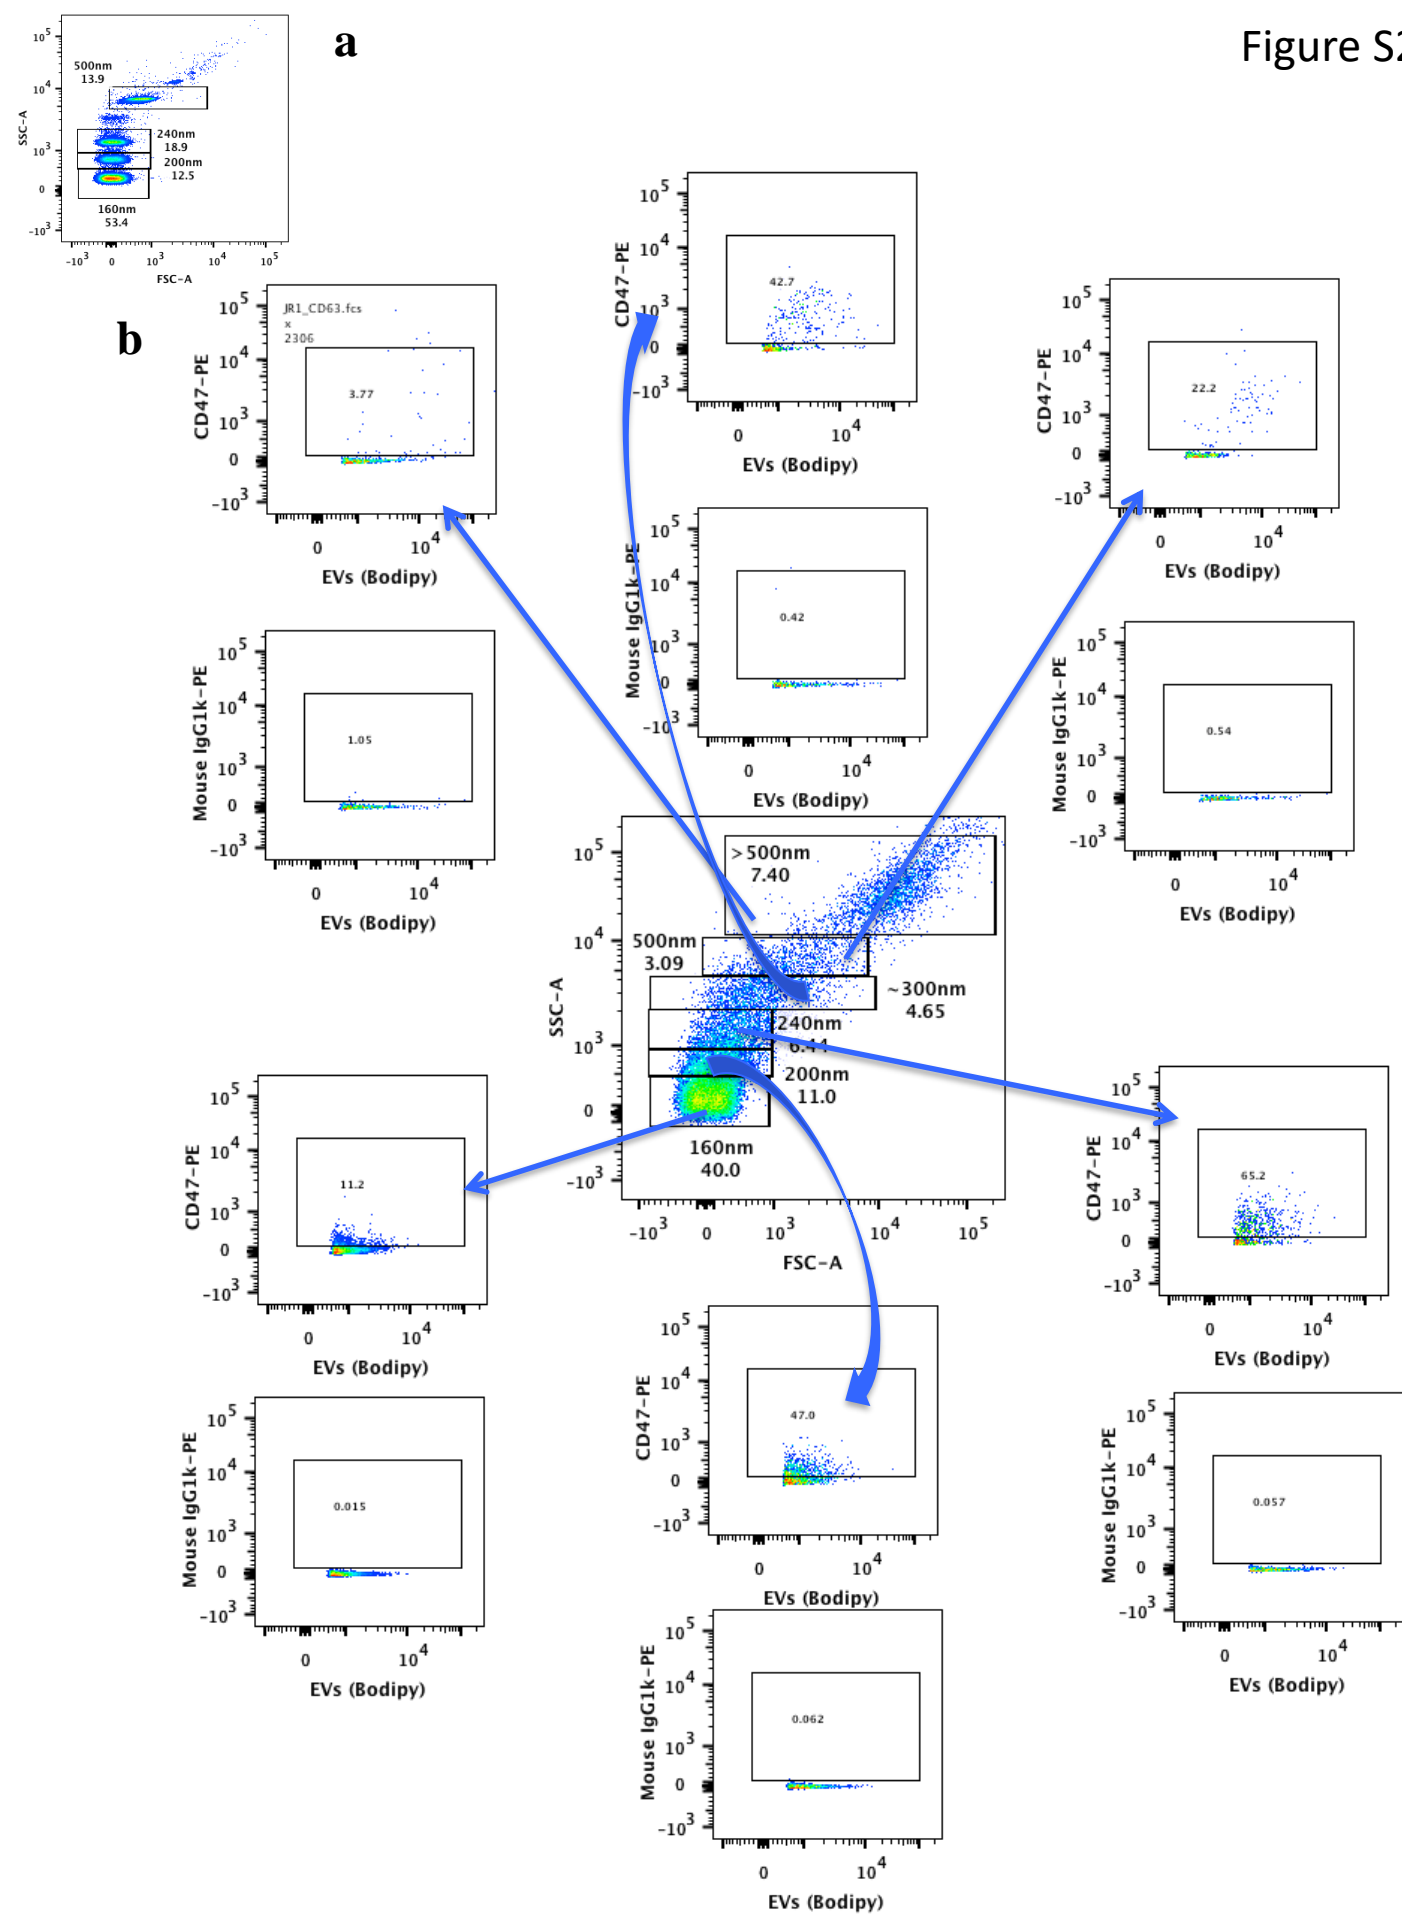

Figure S3

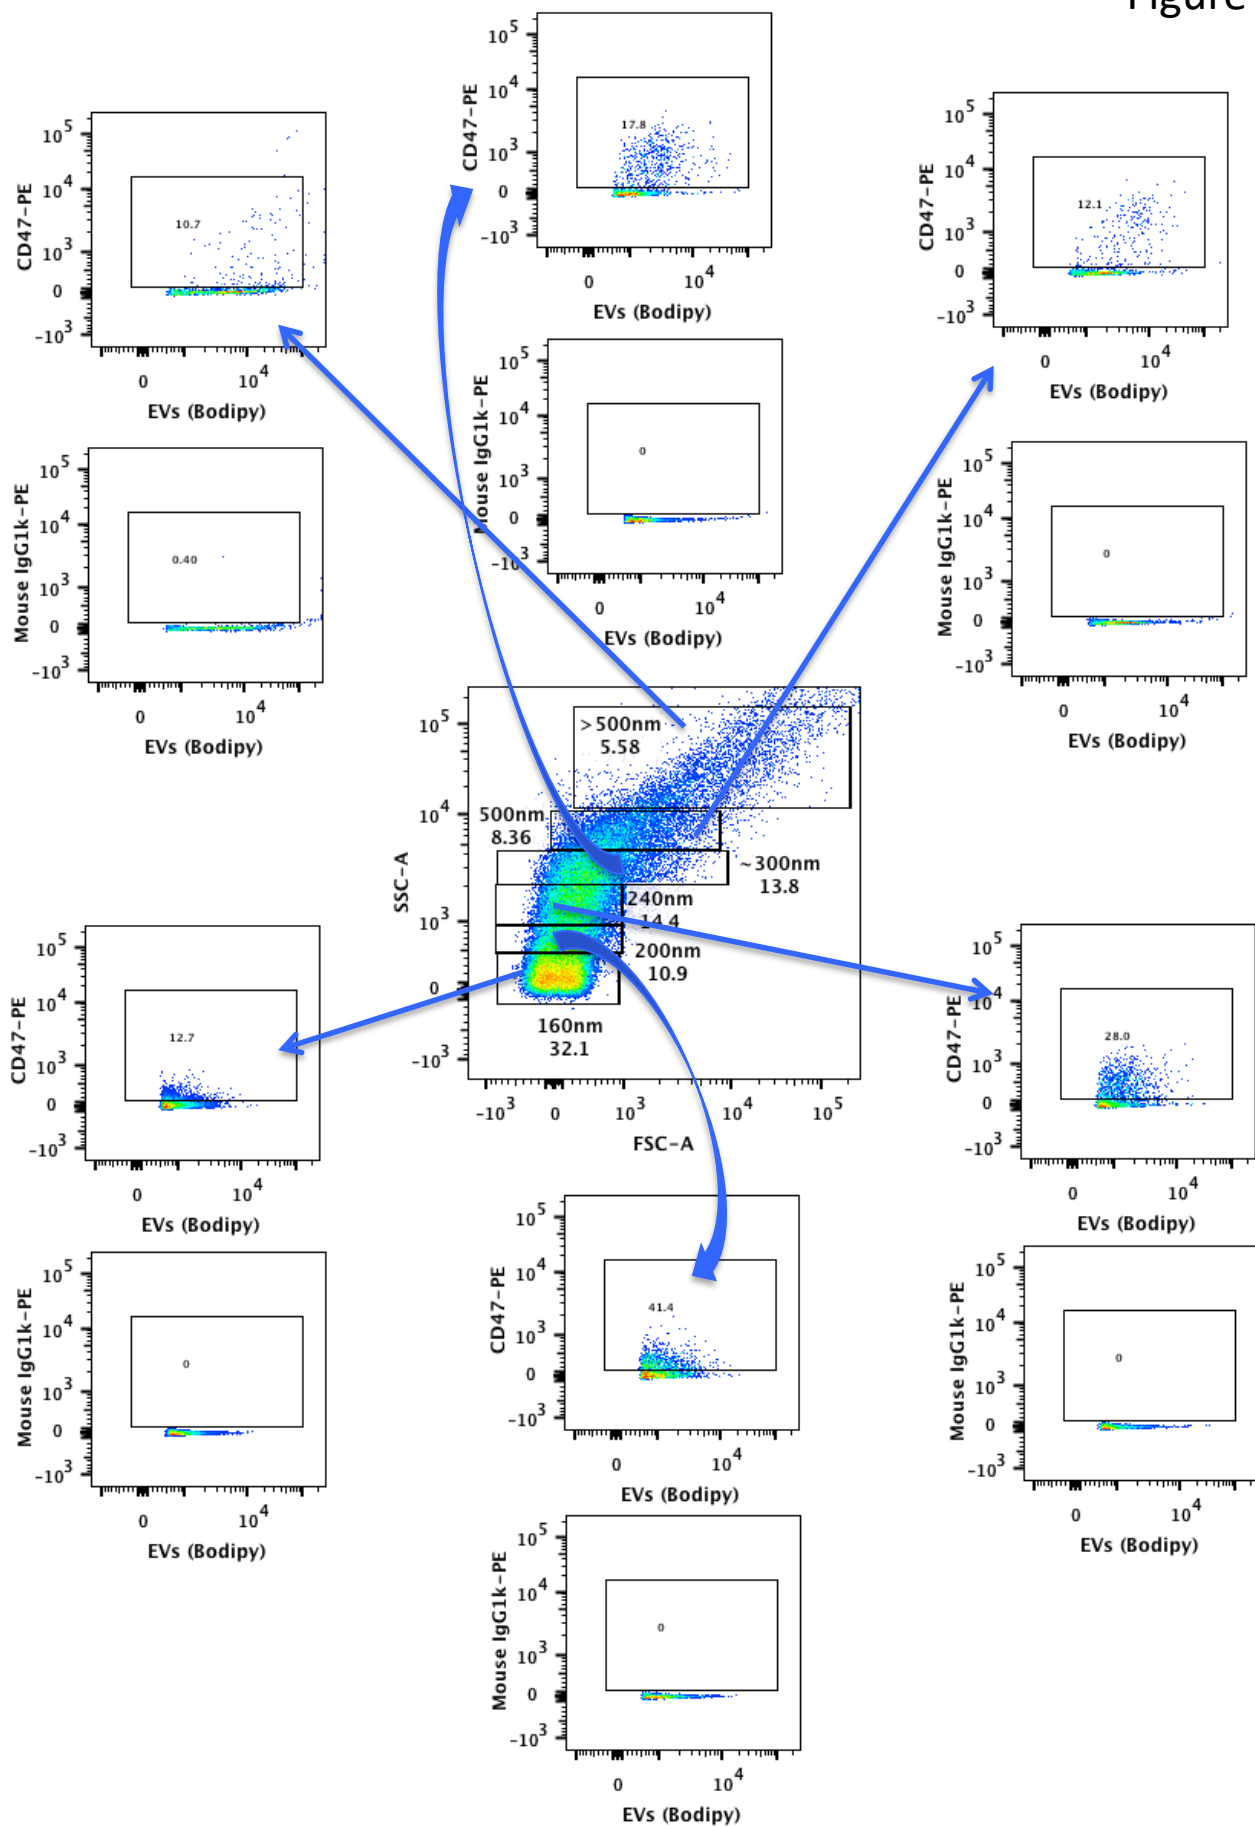

Figure S4

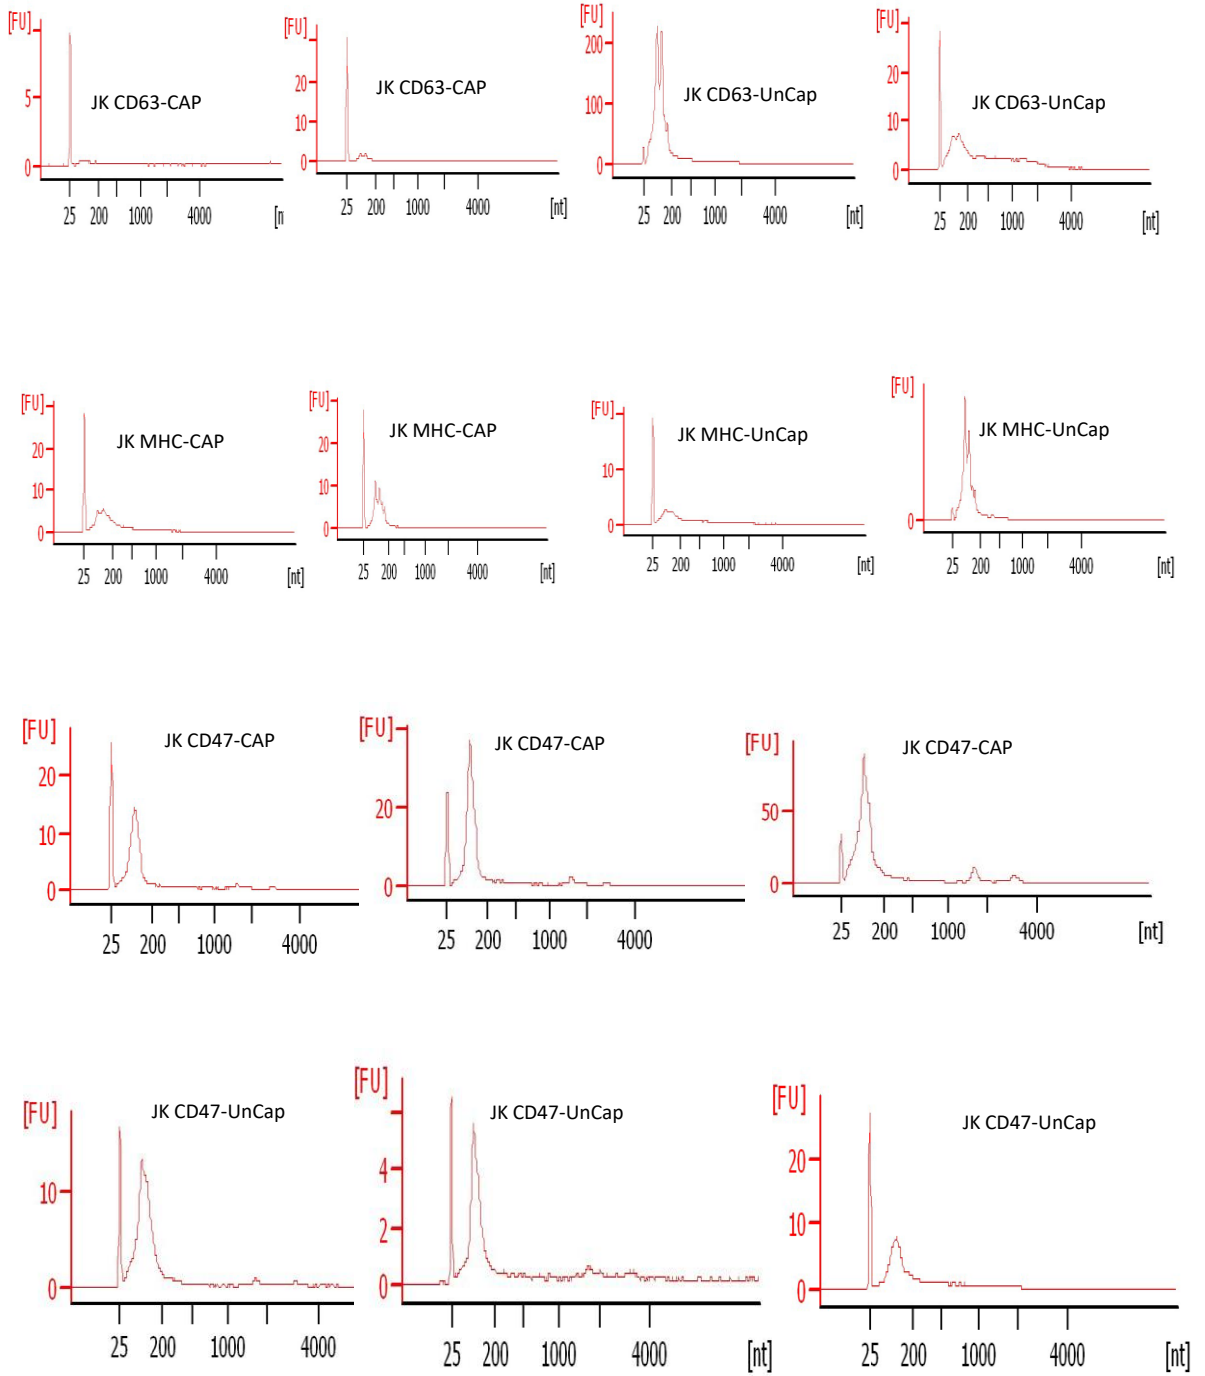

Figure S5

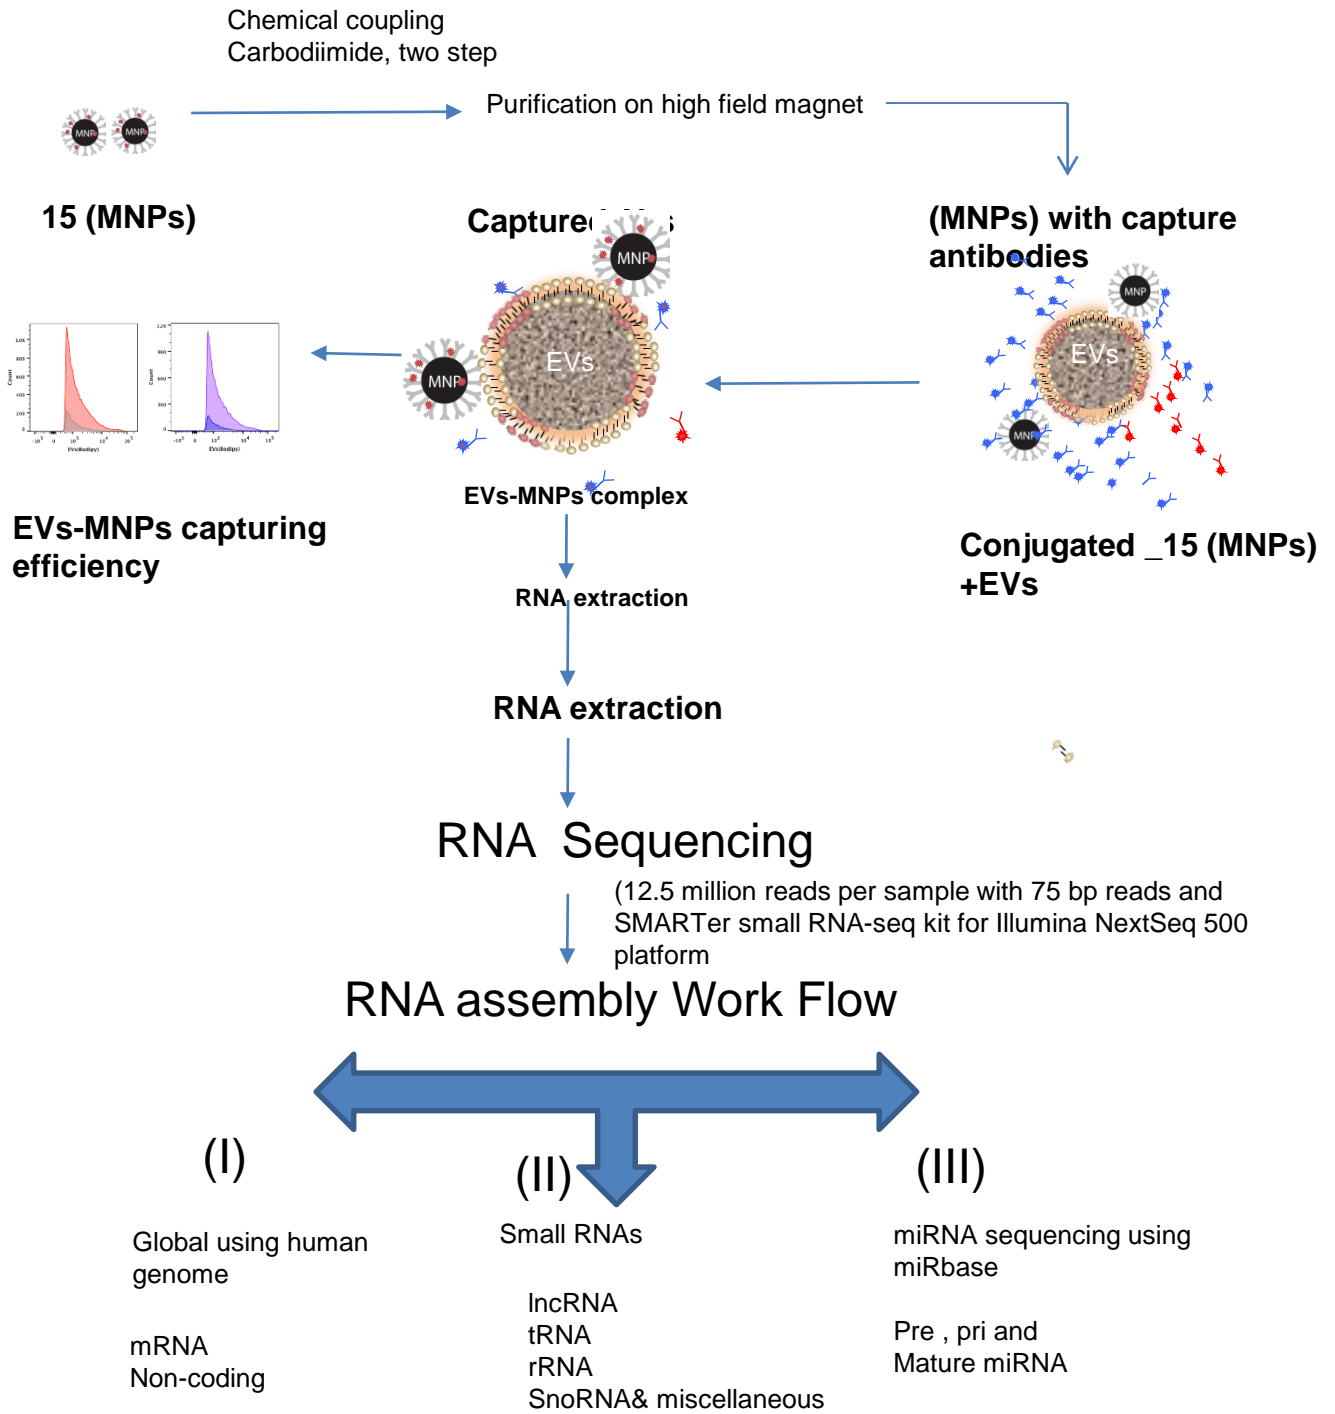

**Normalization methods**

RPKM

RPM

RPM



Figure S6

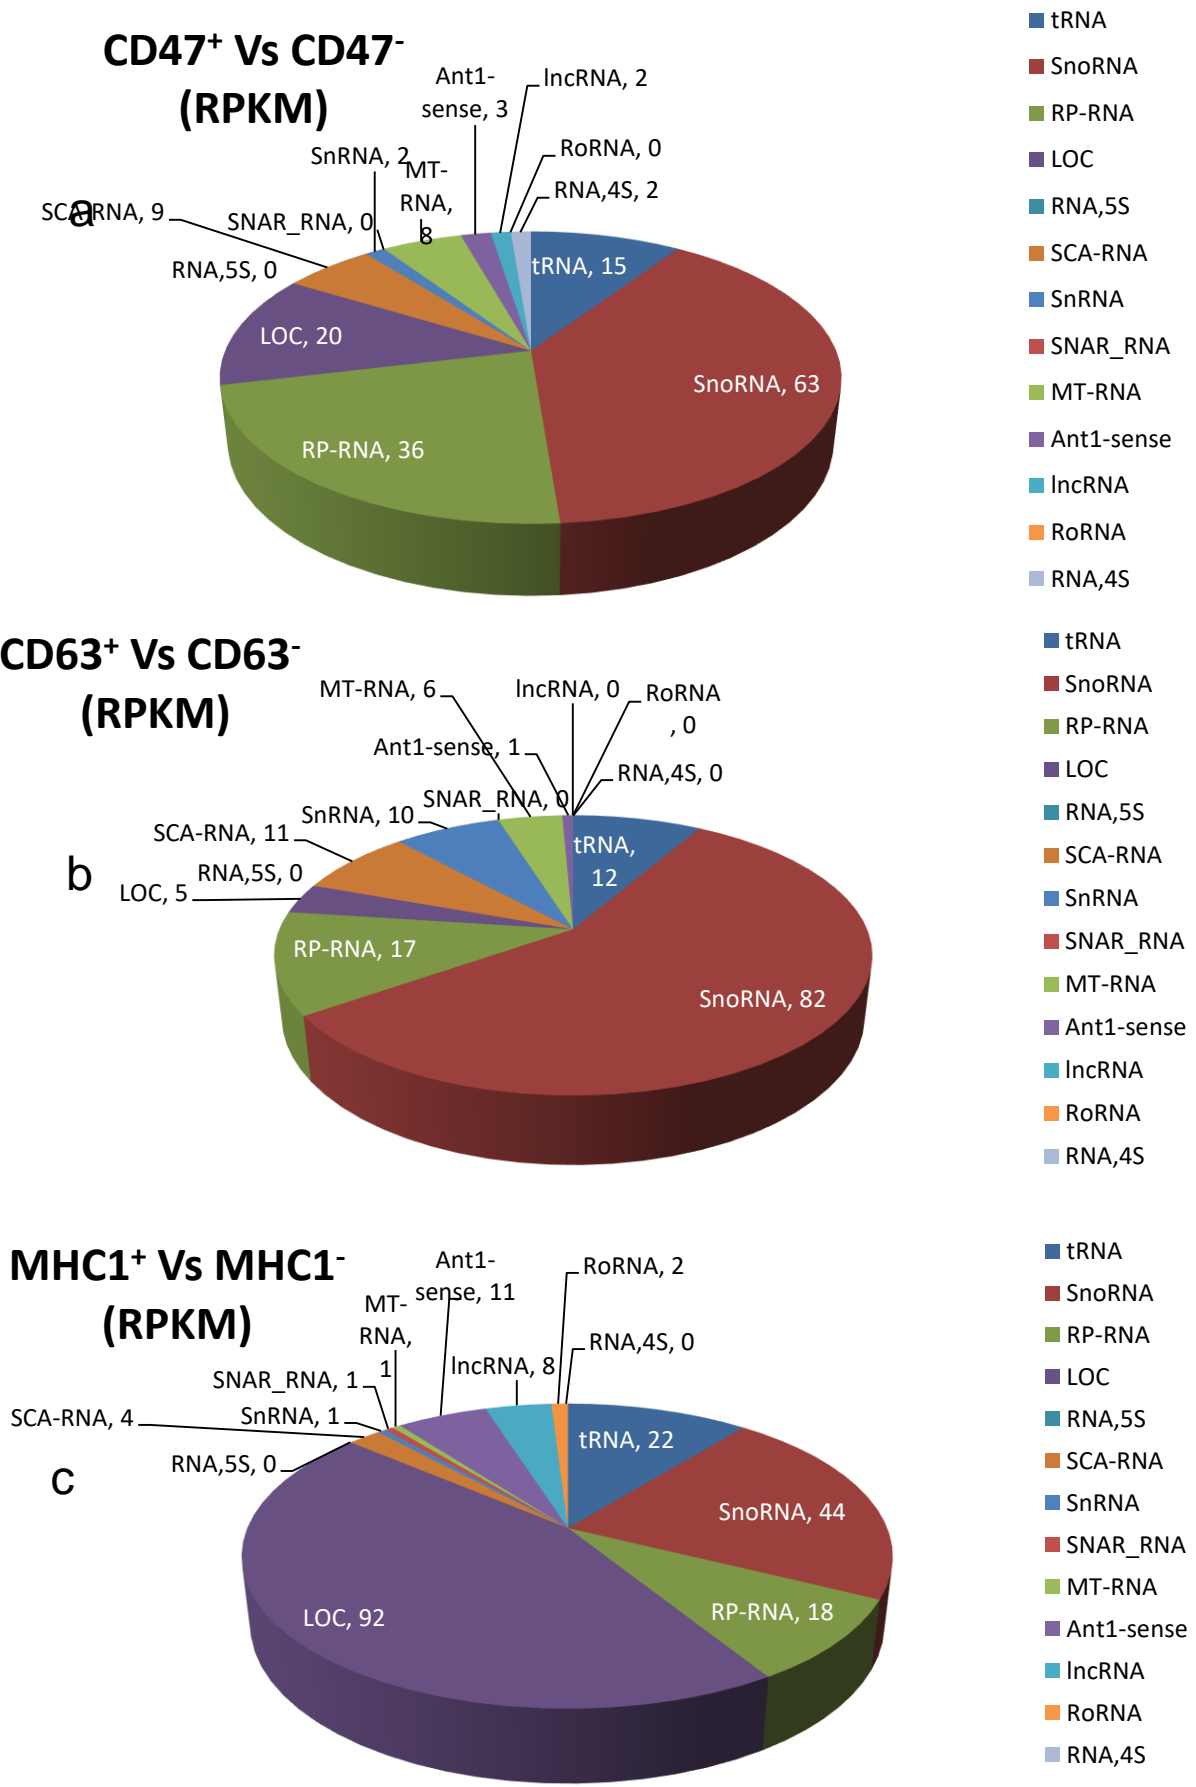

Figure S7

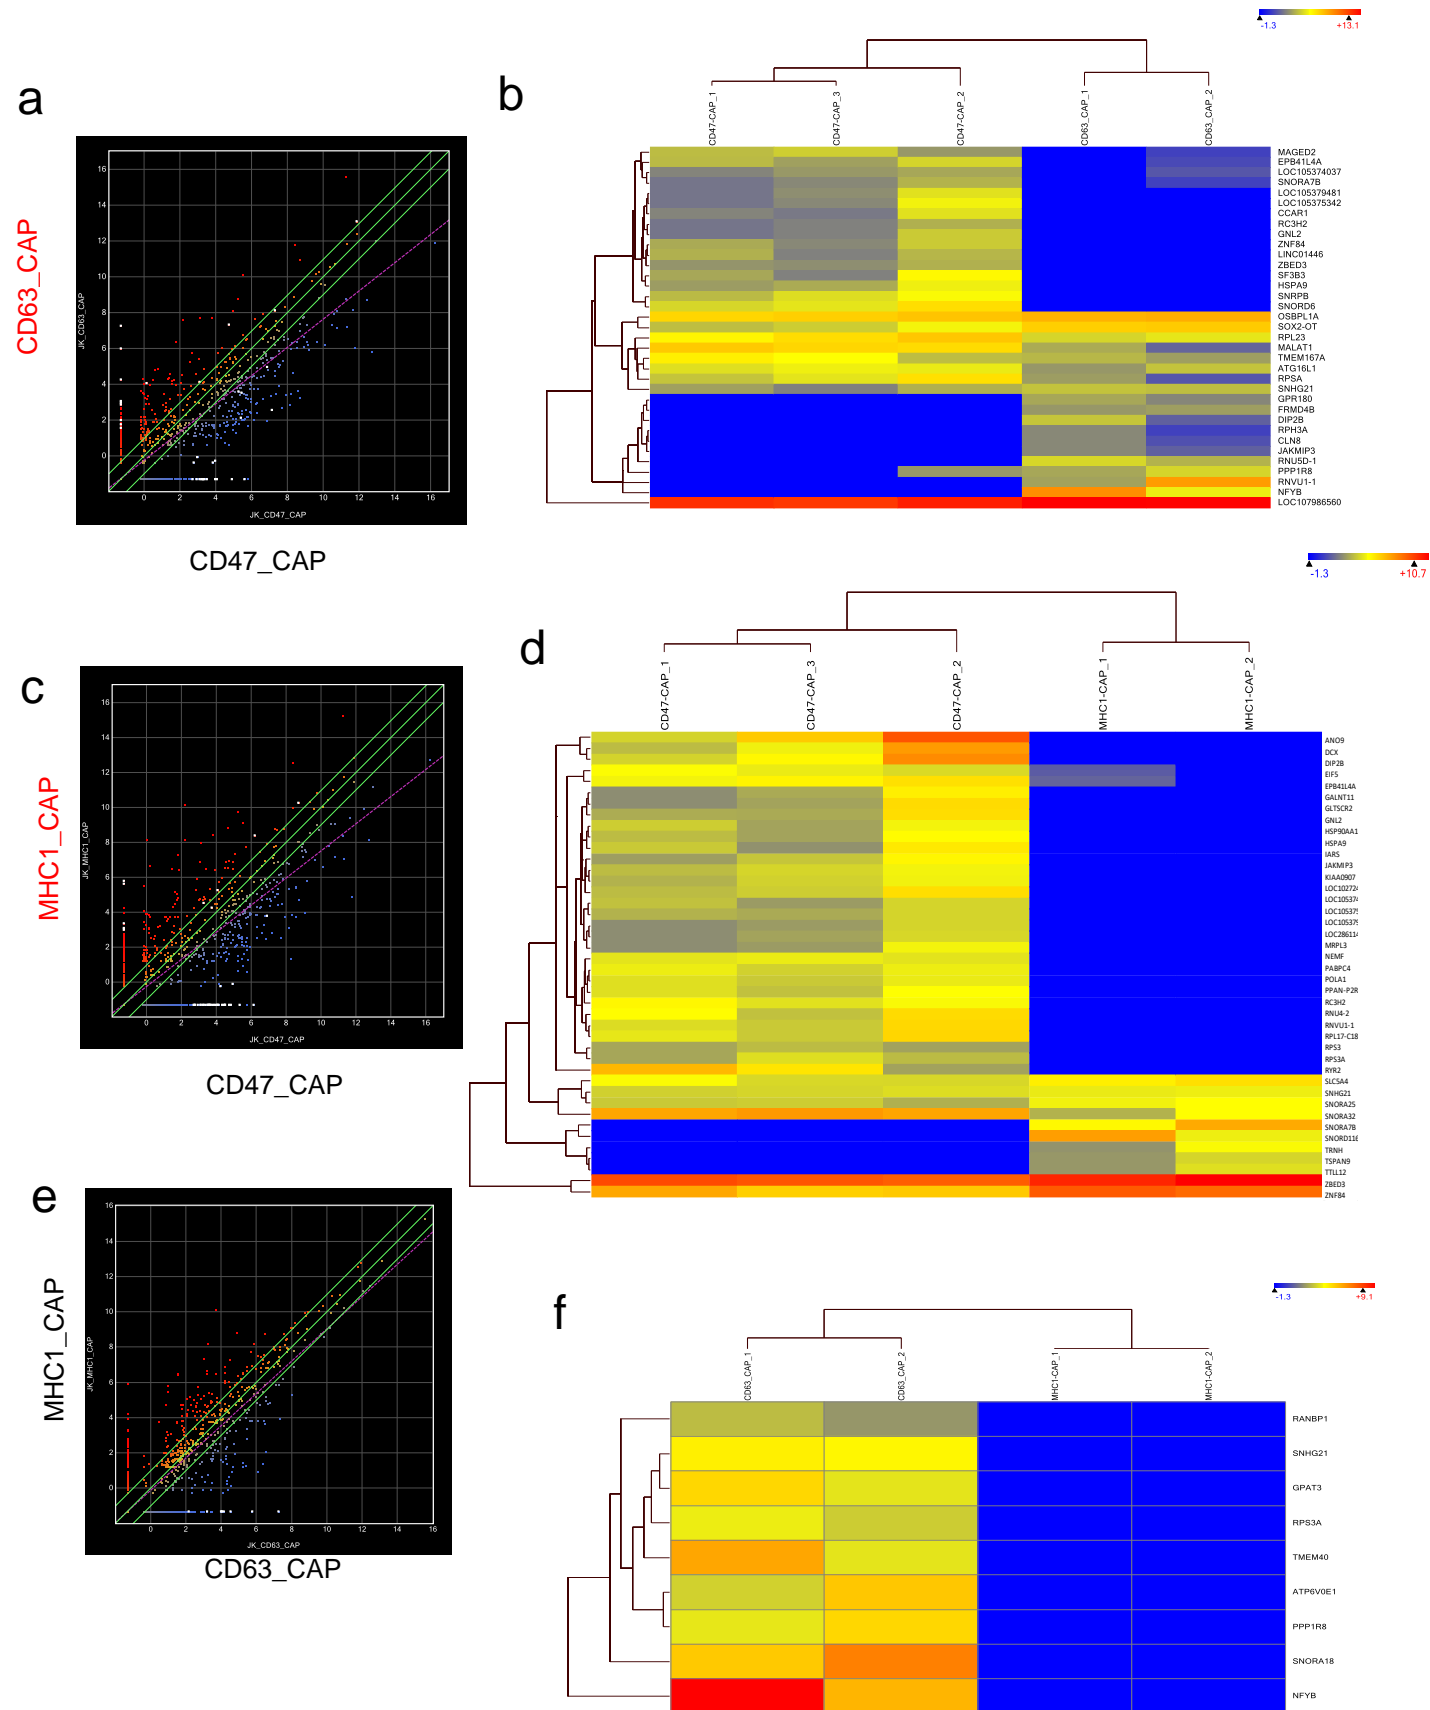

Figure S8

# Method III

a

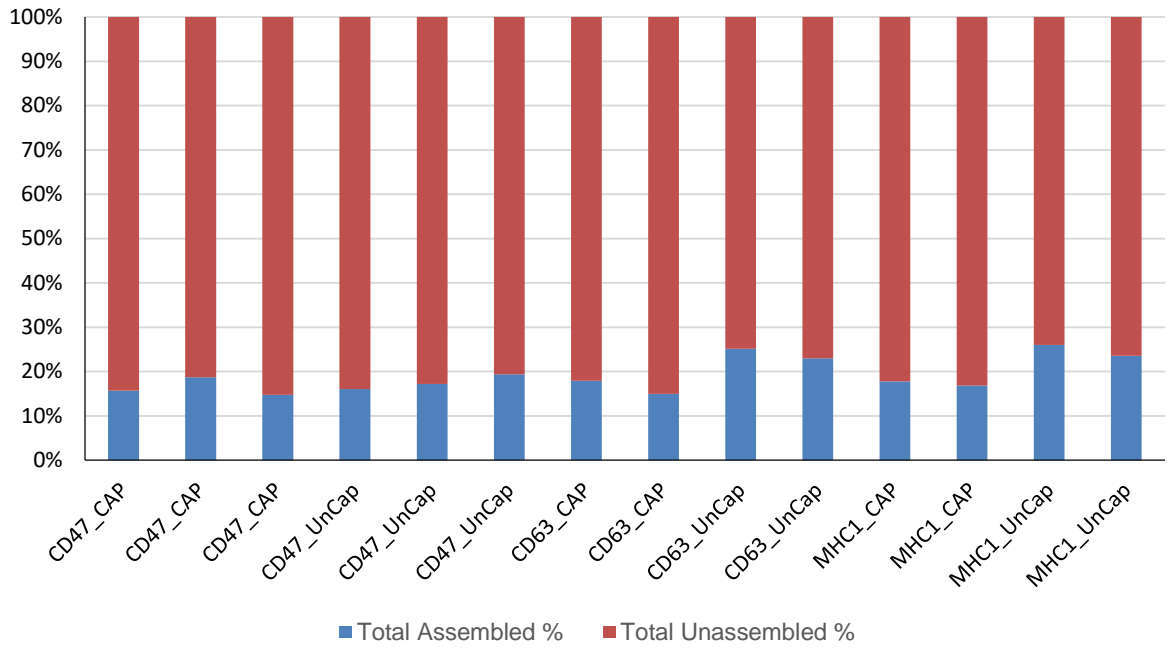

b

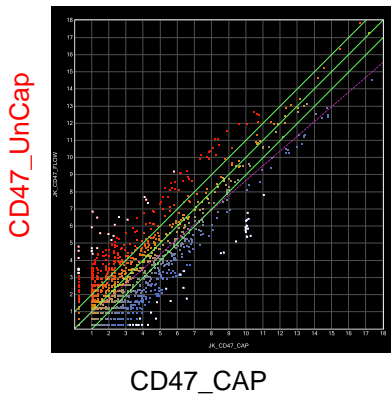

66miRNA @8-fold  
1491miRNAs@2-fold

c

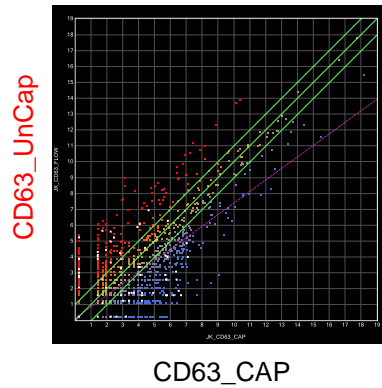

240miRNAs @8-fold  
1971miRNAs@2-fold

d

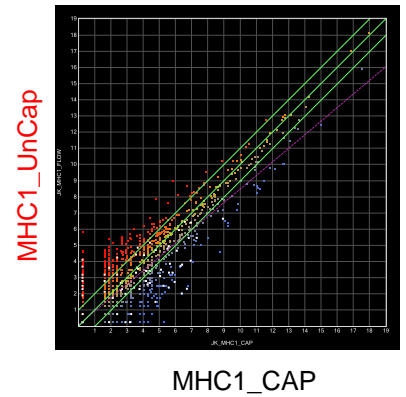

97miRNAs @8-fold  
1768miRNAs@2-fold

Figure S9

a

|                | CD47_CAP -<br>linear total<br>RPM | CD63_CAP -<br>linear total<br>RPM | MHC1_CAP -<br>linear total<br>RPM |
|----------------|-----------------------------------|-----------------------------------|-----------------------------------|
| hsa-mir-106b   | 1.179                             | 1.179                             | 9.571                             |
| hsa-miR-142-3p | 2.619                             | 10.64                             | 9.571                             |
| hsa-miR-185-5p | 1.179                             | 1.179                             | 9.571                             |
| hsa-mir-3610   | 2.238                             | 1.179                             | 9.571                             |
| hsa-mir-620    | 1.179                             | 1.179                             | 9.571                             |
| hsa-mir-663b   | 7.304                             | 2.718                             | 9.571                             |
| hsa-mir-664b   | 21.369                            | 4.616                             | 9.571                             |

b

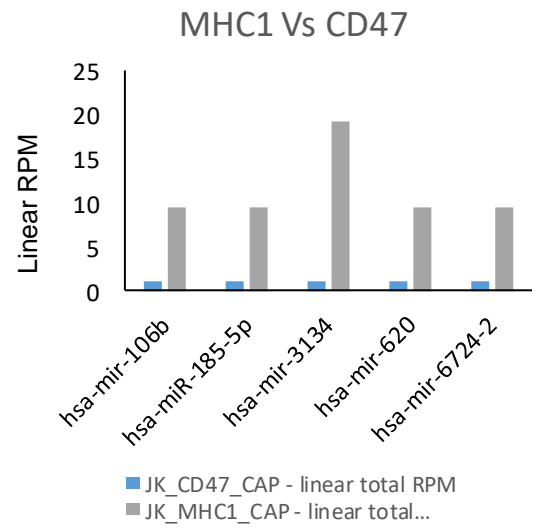

c

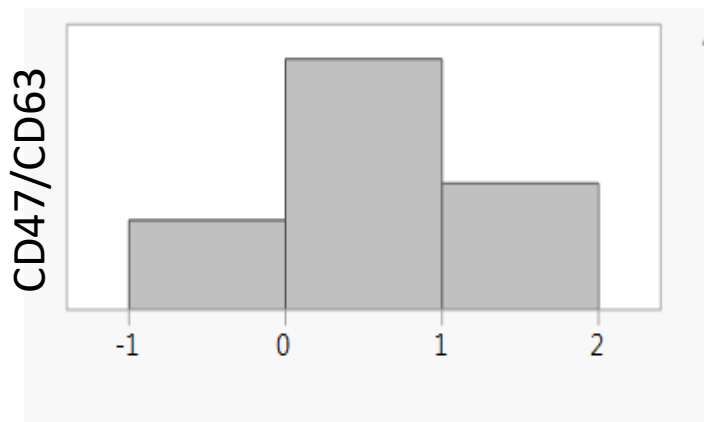

d

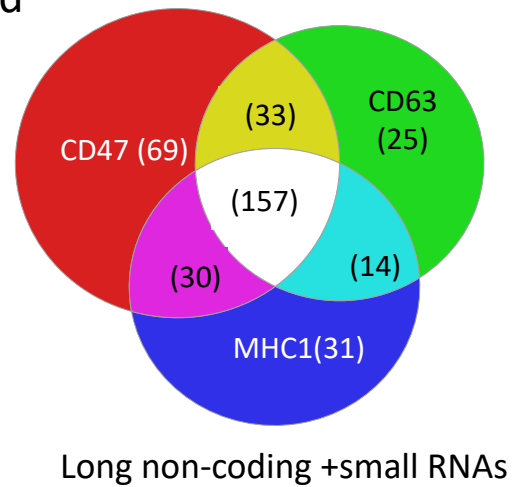

Supplementary Excel file notes for Kaur et al

**File Name: Table A \_B\_new Fig2\_ Method I\_RPKM**

**Contents**

1. Data for Figure 2 pie charts (21 excel sheets) -Table-A
2. Data for FDR analysis with RPKM\_Method (I)-Table B
3. Table S3 (Mapped and unmapped reads using Method (1))
4. Fig S6 2-fold change Captured vs uncaptured

**File Name: Table S4\_ Raw data**

**Contents**

1. Table S4 (Mapped and unmapped reads using Method (III))
